# Supplementary material
Source: MDPI journal article supplement (https://www.mdpi.com/2514-183X/8/2/17)
Supplement: s1 [file s1]

Supplementary Table S1.

| Patient | Age | Sex | Race      | In-hospital death                                              | Etiological classification            |                                  |
|---------|-----|-----|-----------|----------------------------------------------------------------|---------------------------------------|----------------------------------|
|         |     |     |           |                                                                | Anatomopathological findings (FC/NFC) | TOAST (Presumed Stroke Etiology) |
| 1       | 90  | F   | caucasian | pneumothorax with respiratory failure and acute kidney failure | FC                                    | cardioembolism                   |
| 2       | 95  | F   | caucasian | -                                                              | FC                                    | cardioembolism                   |
| 3       | 73  | M   | caucasian | -                                                              | FC                                    | cardioembolism                   |
| 4       | 82  | F   | caucasian | -                                                              | FC                                    | large-artery atherosclerosis     |
| 5       | 56  | M   | caucasian | -                                                              | FC                                    | undetermined                     |
| 6       | 72  | M   | caucasian | -                                                              | FC                                    | cardioembolism                   |
| 7       | 89  | F   | caucasian | -                                                              | FC                                    | undetermined                     |
| 8       | 47  | F   | caucasian | -                                                              | FC                                    | cardioembolism                   |
| 9       | 69  | M   | caucasian | -                                                              | FC                                    | cardioembolism                   |
| 10      | 60  | M   | caucasian | -                                                              | NFC                                   | undetermined                     |
| 11      | 66  | M   | caucasian | -                                                              | FC                                    | undetermined                     |
| 12      | 89  | F   | caucasian | -                                                              | FC                                    | undetermined                     |
| 13      | 61  | M   | caucasian | -                                                              | NFC                                   | cardioembolism                   |
| 14      | 78  | F   | caucasian | -                                                              | NFC                                   | cardioembolism                   |
| 15      | 84  | M   | caucasian | -                                                              | NFC                                   | undetermined                     |
| 16      | 58  | M   | caucasian | -                                                              | FC                                    | undetermined                     |
| 17      | 63  | F   | caucasian | -                                                              | NFC                                   | undetermined                     |
| 18      | 68  | F   | caucasian | -                                                              | NFC                                   | large-artery atherosclerosis     |
| 19      | 76  | M   | caucasian | -                                                              | FC                                    | cardioembolism                   |
| 20      | 68  | M   | caucasian | -                                                              | NFC                                   | large-artery atherosclerosis     |
| 21      | 78  | F   | caucasian | -                                                              | NFC                                   | undetermined                     |
| 22      | 80  | F   | caucasian | -                                                              | NFC                                   | large-artery atherosclerosis     |
| 23      | 65  | F   | caucasian | -                                                              | FC                                    | large-artery atherosclerosis     |
| 24      | 70  | M   | caucasian | -                                                              | FC                                    | undetermined                     |

|    |    |   |           |                                                                                       |     |                |
|----|----|---|-----------|---------------------------------------------------------------------------------------|-----|----------------|
| 25 | 74 | F | caucasian | -                                                                                     | NFC | cardioembolism |
| 26 | 91 | M | caucasian | Acute kidney failure and sepsis with multiorgan failure                               | NFC | undetermined   |
| 27 | 65 | F | caucasian | -                                                                                     | NFC | undetermined   |
| 28 | 82 | M | caucasian | -                                                                                     | NFC | cardioembolism |
| 29 | 79 | M | caucasian | large ischemic stroke, left ventricular systolic dysfunction and acute kidney failure | NFC | cardioembolism |
| 30 | 70 | F | caucasian | -                                                                                     | NFC | cardioembolism |
| 31 | 73 | M | caucasian | -                                                                                     | NFC | cardioembolism |
| 32 | 77 | F | caucasian | -                                                                                     | NFC | cardioembolism |
| 33 | 78 | M | caucasian | -                                                                                     | NFC | undetermined   |
| 34 | 96 | M | caucasian | -                                                                                     | NFC | cardioembolism |
| 35 | 61 | M | caucasian | -                                                                                     | NFC | undetermined   |
| 36 | 52 | M | caucasian | -                                                                                     | NFC | undetermined   |
| 37 | 61 | M | caucasian | -                                                                                     | NFC | undetermined   |
| 38 | 81 | F | caucasian | -                                                                                     | NFC | undetermined   |
| 39 | 76 | F | caucasian | -                                                                                     | FC  | undetermined   |
| 40 | 64 | F | caucasian | -                                                                                     | NFC | undetermined   |
| 41 | 80 | M | caucasian | -                                                                                     | FC  | cardioembolism |
| 42 | 84 | F | caucasian | -                                                                                     | NFC | cardioembolism |
| 43 | 73 | F | caucasian | -                                                                                     | NFC | undetermined   |
| 44 | 74 | F | caucasian | -                                                                                     | NFC | cardioembolism |
| 45 | 90 | F | caucasian | -                                                                                     | NFC | cardioembolism |
| 46 | 65 | M | caucasian | -                                                                                     | NFC | cardioembolism |
| 47 | 83 | F | caucasian | -                                                                                     | FC  | cardioembolism |
| 48 | 69 | M | caucasian | -                                                                                     | NFC | undetermined   |
| 49 | 59 | M | caucasian | -                                                                                     | NFC | cardioembolism |
| 50 | 81 | F | caucasian | -                                                                                     | NFC | cardioembolism |
| 51 | 82 | F | caucasian | -                                                                                     | NFC | cardioembolism |

|    |    |   |           |                                                                        |     |                              |
|----|----|---|-----------|------------------------------------------------------------------------|-----|------------------------------|
| 52 | 37 | F | caucasian | -                                                                      | NFC | undetermined                 |
| 53 | 67 | M | caucasian | large ischemic stroke with massive subarachnoid hemorrhage             | NFC | undetermined                 |
| 54 | 73 | M | caucasian | -                                                                      | NFC | large-artery atherosclerosis |
| 55 | 78 | M | caucasian | -                                                                      | NFC | large-artery atherosclerosis |
| 56 | 70 | F | caucasian | -                                                                      | NFC | cardioembolism               |
| 57 | 78 | F | caucasian | -                                                                      | FC  | undetermined                 |
| 58 | 90 | F | caucasian | -                                                                      | FC  | cardioembolism               |
| 59 | 79 | F | caucasian | -                                                                      | NFC | cardioembolism               |
| 60 | 77 | M | caucasian | -                                                                      | FC  | undetermined                 |
| 61 | 65 | M | caucasian | -                                                                      | FC  | undetermined                 |
| 62 | 77 | F | caucasian | -                                                                      | NFC | undetermined                 |
| 63 | 78 | F | caucasian | -                                                                      | NFC | large-artery atherosclerosis |
| 64 | 93 | F | caucasian | large ischemic stroke and bilateral pneumonia with respiratory failure | NFC | cardioembolism               |
| 65 | 81 | M | caucasian | -                                                                      | NFC | undetermined                 |
| 66 | 78 | M | caucasian | -                                                                      | NFC | large-artery atherosclerosis |
| 67 | 82 | M | caucasian | -                                                                      | NFC | cardioembolism               |
| 68 | 70 | F | caucasian | -                                                                      | NFC | cardioembolism               |
| 69 | 81 | F | caucasian | -                                                                      | NFC | undetermined                 |
| 70 | 60 | M | caucasian | -                                                                      | FC  | large-artery atherosclerosis |
| 71 | 86 | M | caucasian | -                                                                      | NFC | undetermined                 |
| 72 | 57 | M | caucasian | -                                                                      | FC  | cardioembolism               |
| 73 | 65 | M | caucasian | -                                                                      | NFC | undetermined                 |
| 74 | 45 | M | caucasian | -                                                                      | NFC | large-artery atherosclerosis |
| 75 | 77 | M | caucasian | -                                                                      | NFC | large-artery atherosclerosis |
| 76 | 81 | M | caucasian | -                                                                      | NFC | cardioembolism               |
| 77 | 64 | M | caucasian | -                                                                      | NFC | undetermined                 |
| 78 | 53 | M | caucasian | -                                                                      | NFC | other causes                 |
| 79 | 81 | F | caucasian | -                                                                      | NFC | cardioembolism               |

|     |    |   |           |                                                                         |     |                              |
|-----|----|---|-----------|-------------------------------------------------------------------------|-----|------------------------------|
| 80  | 94 | M | caucasian | malignant middle cerebral artery infarction with parenchymal hemorrhage | NFC | large-artery atherosclerosis |
| 81  | 82 | F | caucasian | -                                                                       | NFC | undetermined                 |
| 82  | 54 | M | asian     | -                                                                       | FC  | cardioembolism               |
| 83  | 72 | M | caucasian | -                                                                       | NFC | undetermined                 |
| 84  | 75 | M | caucasian | -                                                                       | FC  | undetermined                 |
| 85  | 71 | F | caucasian | -                                                                       | NFC | undetermined                 |
| 86  | 98 | F | caucasian | -                                                                       | NFC | cardioembolism               |
| 87  | 82 | F | caucasian | -                                                                       | NFC | large-artery atherosclerosis |
| 88  | 73 | F | caucasian | -                                                                       | NFC | undetermined                 |
| 89  | 69 | M | caucasian | -                                                                       | FC  | cardioembolism               |
| 90  | 70 | F | caucasian | -                                                                       | NFC | undetermined                 |
| 91  | 85 | M | caucasian | -                                                                       | NFC | cardioembolism               |
| 92  | 76 | F | caucasian | -                                                                       | NFC | undetermined                 |
| 93  | 46 | M | caucasian | -                                                                       | NFC | undetermined                 |
| 94  | 88 | F | caucasian | large ischemic stroke and severe tachyarrhythmia                        | NFC | cardioembolism               |
| 95  | 78 | F | caucasian | -                                                                       | FC  | undetermined                 |
| 96  | 76 | M | caucasian | -                                                                       | NFC | cardioembolism               |
| 97  | 84 | F | caucasian | -                                                                       | NFC | large-artery atherosclerosis |
| 98  | 73 | M | caucasian | -                                                                       | NFC | large-artery atherosclerosis |
| 99  | 65 | F | caucasian | -                                                                       | NFC | cardioembolism               |
| 100 | 74 | M | caucasian | -                                                                       | FC  | large-artery atherosclerosis |

Supplementary Table S1. In-hospital mortality and detailed comparison between anatomopathological findings and presumed stroke etiology by TOAST criteria. NFC, Non-foam Cells; FC, Foam Cells.
